# Supplementary material for: Exploring Factors Associated With Hepatitis B Screening Among a Multilingual and Diverse Population
Source: Research Square preprint supplement (doi:10.21203/rs.3.rs-712936/v1), 2021-07-28
Supplement: Supplementary file 1 [file 2b3d6d73c253771df0335bbf.pdf]

**Appendix B:** Health Behavior Framework<sup>a</sup> describes individual variables; provider and health care system factors; and individual, system, and societal barriers and supports for hepatitis B screening.

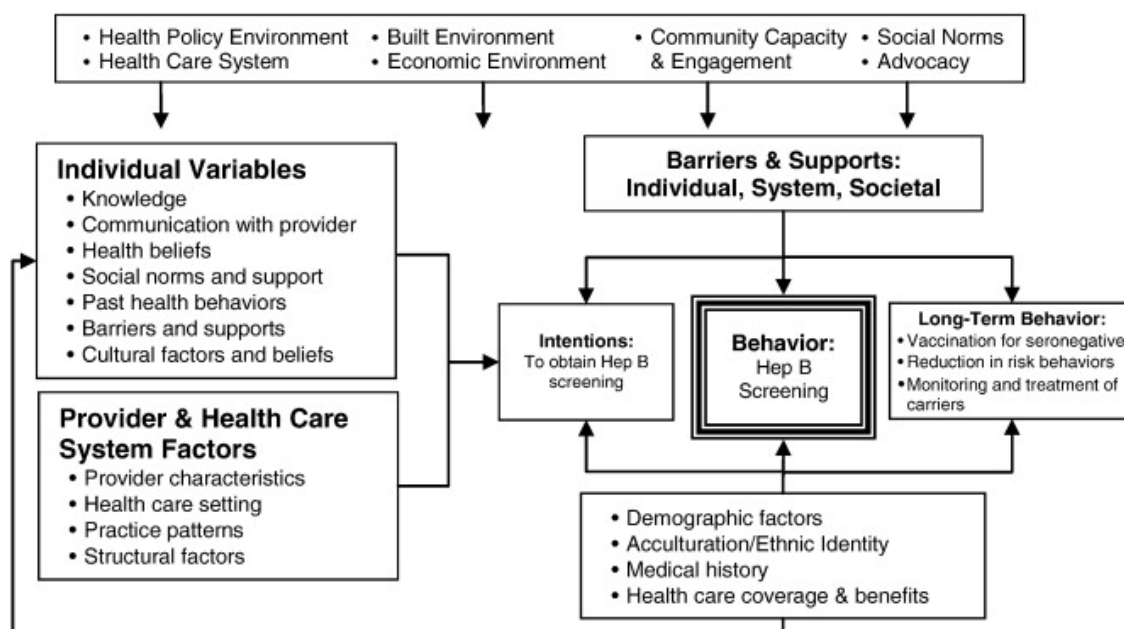

<sup>a</sup>Bastani R, Glenn BA, Taylor VM, et al. Integrating Theory into Community Interventions to Reduce Liver Cancer Disparities: The Health Behavior Framework. *Prev Med.* 2010;50(1-2):63-67.
